# Supplementary material for: Sustainable Tourism, Social and Institutional Innovation—The Paradox of Dark Sky in Astrotourism
Source: MDPI journal article supplement (doi:10.3390/su14116419), 2022-05-24
Supplement: s1 [file s1]

Archive with 1 entries (1 files):
- sustainability-1680144-supplementary.pdf
