# Supplementary material for: Sustainable Tourism, Social and Institutional Innovation—The Paradox of Dark Sky in Astrotourism
Source: MDPI journal article supplement (doi:10.3390/su14116419), 2022-05-24
Supplement: s1 [file s1 › sustainability-1680144-supplementary.pdf]

## **Annex: Interview - Relevant Informants**

### **First set of questions: Astrotourism in Aragon**

Astrotourism is a type of tourism that uses the sky as the main resource for its development. The Aragonese Strategic Plan of Tourism PAET 2016-2020 classifies astrotourism as an innovative product tending to emerge

1-I would like to know if it is possible, if you have... What is your opinion regarding this type of tourism?

2.- Do you think astrotourism is a type of tourism on the rise in recent years in Aragon?

3.-Do you consider that astrotourism can be considered as an additional offer to other tourist activities such as rural tourism, cultural tourism, etc.?

4.- Do you think that a type of tourism like this can help to deseasonalise it in our region?

5.- Do you think that there is currently social, political or economic interest in the development of astrotourism in Aragon?

6.- What initiatives would be necessary to carry out from the public sphere to help develop and consolidate this type of emerging and innovative tourism in our community?

7- What would be in your opinion the socioeconomic impacts of the development of astrotourism in Aragon?

### **Second set of questions: The starry sky as a territorial resource**

8.- Do you think that a modification of the current legislation on light pollution would be necessary to favour nighttime activities that are part of astronomical tourism?

9.-At present, there are international organisations that grant certifications recognising the quality of the night sky of a certain territory, such as that obtained by certain locations within the Gúdar –Javalambre Region.

What impact do sky quality certifications awarded by certain international institutions have on astrotourists?

10.-The starry sky as a territorial and tourist resource. What do you think?

Would you agree to the development of public policies for its maintenance, controlling light pollution in Aragon, especially in certain areas for developing this type of tourism?

I would be delighted if you would consider or want to add any comment or question related to this exciting topic of astrotourism.

MANY THANKS FOR YOUR COLLABORATION
